# Supplementary material for: A simplified counter-selection recombineering protocol for creating fluorescent protein reporter constructs directly from C. elegans fosmid genomic clones
Source: PubMed Central journal article supplement (PMC3561212; doi:10.1186/1472-6750-13-1), 2013-01-03
Supplement: 1472-6750-13-1-S1.pdf [file 1472-6750-13-1-S1.pdf]

## Supplementary methods

### Design and synthesis of codon-optimized DNA sequences and derivation of pGOv5-based sub-clones

DNA sequences were designed (Gene Designer, DNA 2.0) to be codon-optimized for expression in *C. elegans*, using a codon frequency exclusion threshold of 12%, and to be flanked by unique RE sites to facilitate subsequent manipulation and sub-clone derivation. Designed sequences encoded the FPs mCerulean [18], mTFP1 [19], mCitrine [20] and mCherry [17] and, in addition, an N-TAP-tag and C-TAP-tag designed to fuse, respectively, to the *N*- or *C*-termini of each FP (Fig. S1). By 'fixing' the choice of 2 to 3 adjacent codons, prior to reverse-translation, at least two unique internal blunt-cutting RE sites were included in each FP coding sequence (CDS) to enable facile post-synthesis introduction of artificial introns. mCerulean and mCitrine CDSs included the monomerizing mutation A206K associated with *Aequorea* GFP variants [43]. All FP sequences were, within the constraints of design and codon-optimization criteria, also designed to be, where possible, different from one another in order to minimize the risk of intra-molecular recombination when two or more CDSs would be present in the same, final construct. Both versions of the TAP-tag were designed to be fused to the FP through a flexible [(G<sub>4</sub>S)<sub>3</sub>] linker followed by the internal affinity tag StrepTag II [WSHPQFEK] [44], a short [G<sub>4</sub>S] linker, a PreScission protease site [LEVLFGQP] [45], a second [G<sub>4</sub>S] linker and, finally, the external affinity tag S-Tag [KETAAAKFERQHMDL] [46] (Fig. S1, panels A & B). For ease of post-synthesis sub-clone derivation the C-TAP-tag was followed, additionally, by a sequence [PKKKRKVGGGPKKKRKV] containing two contiguous SV40 nuclear localization signals (2xNLS) flanked by *MscI* and *AfeI* sites to enable its subsequent excision. All coding sequences were terminated with two contiguous stop codons (TAA-TAG). Sequences, encoding the N-TAP-tag and C-TAP-tag, the latter fused, in-frame, to mTFP1 (Fig. S1, panel B), were commercially synthesized (Gene Oracle) in the proprietary RE site-depleted vector pGOv5 and designated pNH001 and pNH002, respectively. Sequences encoding mCitrine, mCherry and mCerulean were synthesized (Mr Gene) in the

proprietary vector pMK and the resulting plasmids designated pNH003, pNH004 and pNH005, respectively. All FP sequences lacked the *N*-terminal Met-Val residues and *C*-terminal Lys residue present in their respective native sequences.

A series of sub-clones were built up from the original synthesized units by standard sub-cloning procedures (Table S1). Briefly, each FP-encoding sequence was first excised, as a *KasI-SacI* fragment, from each of pNH003, pNH004 and pNH005 and introduced into the *KasI-SacI*-restricted and gel-purified backbone of pNH002 to generate, respectively, pNH006, pNH007 and pNH008 each containing an N-TAP-tag:: $[(G_4S)_3]$ ::FP style CDS. Excision of an *NaeI-SfoI* section from within each of pNH002, pNH006, pNH007 and pNH008 removed the  $[(G_4S)_3]$  linker generating, following ligation of the vector backbone, pNH009, pNH010, pNH011 and pNH012, respectively. To generate discrete, intact FP CDSs the N-TAP-tag was excised, as an *NcoI-NcoI* fragment, from each of pNH009, pNH010, pNH011 and pNH012 which were then rejoined to generate pNH013 (mTFP1), pNH014 (mCitrine), pNH015 (mCherry) and pNH016 (mCerulean), respectively (Table S1). As a result of the sub-cloning strategy each of these FP sequences contains, in place of the *N*-terminal Met-Val residues and *C*-terminal Lys residue present in the native sequences, respective Met-Ala-Ala and Val-Ser-Ala stretches instead.

To generate constructs encoding open-reading frames of design FP:: $[(G_4S)_3]$ ::C-TAP-tag::2xNLS the  $[(G_4S)_3]$ ::C-TAP-tag::2xNLS region of pNH001 was excised as a *SacI-KpnI* fragment and inserted into the *SacI-KpnI*-restricted and gel-purified backbones of pNH013, pNH014, pNH015 and pNH016 generating, respectively, pNH017, pNH018, pNH019 and pNH020 (Table S1). Removal of the *C*-terminal 2xNLS-encoding sequence from each of the latter was achieved by excision of the encompassing *MscI-AfeI* fragment and backbone re-ligation to generate, respectively, pNH026, pNH027, pNH028 and pNH029. Constructs of design FP:: $[(G_4S)_3]$ ::2xNLS were created by removal of C-TAP-tag-containing *NruI-MscI* fragments from each of pNH017, pNH018, pNH019 and pNH020, generating, following vector re-ligation, pNH030, pNH031, pNH032 and pNH033, respectively (Table S1).

For intron insertion eight pairs of 5' phosphorylated (T4 PNK) 36-nt ODNs (Table S2) were annealed, *via* overlapping complementary 3' stretches, and extended (T4 DNA polymerase) to create eight short (51-bp) blunt-ended, artificial intron sequences designated  $\alpha$ ,  $\beta$ ,  $\gamma$  and B to F and equivalent to those present within a set of the commonly used vectors generated previously by Fire et al. (1990). Introns B,  $\alpha$ ,  $\beta$ ,  $\gamma$  were inserted, at the unique *EcoRV* site present in each of the FP CDSs within pNH013, pNH014, pNH015 and pNH016 generating, respectively, pNH078, pNH079, pNH080 and pNH081 (Table S1). To generate constructs with two artificial introns (2I) sequences C and E were introduced into the unique *BmgBI* sites within pNH078 and pNH080 to give, respectively, pNH082 and pNH084, whereas introns D and F were inserted into the *BstZ171* sites within pNH079 and pNH081 generating, respectively, pNH083 and pNH085 (Table 1). The gene finder package Augustus (<http://augustus.gobics.de/>) was used to predict splicing fidelity of intron-containing FP CDSs.

#### Building *myo-3*<sup>PROM</sup>-driven transcriptional reporters

The FP::[(G<sub>4</sub>S)<sub>3</sub>]::C-TAP-tag::2xNLS units from pNH017 (mTFP1), pNH018 (mCitrine), pNH019 (mCherry) and pNH020 (mCerulean) were excised with *Bam*HI and *Kpn*I and ligated into the *Bam*HI-*Kpn*I-restricted and gel-purified backbone of the *myo-3*<sup>PROM</sup>-containing pPD95.86 (Fire et al, 1990) generating pNH022, pNH023, pNH024 and pNH025, respectively (Table S1). Intronless mTFP1, mCitrine, mCherry and mCerulean CDSs were removed, as *Bam*HI-*Kpn*I fragments, from pNH013, pNH014, pNH015 and pNH016 and sub-cloned into *Bam*HI-*Kpn*I-restricted, gel-purified pPD95.86 to generate, respectively, pNH047, pNH048, pNH035 and pNH049. The corresponding dual-intron-containing FP coding sequences were excised, with *Bam*HI and *Kpn*I, from pNH082 (mTFP1), pNH083 (mCitrine), pNH084 (mCherry) and pNH085 (mCerulean) and transferred into *Bam*HI-*Kpn*I-restricted pPD95.86 generating pNH086, pNH087, pNH088 and pNH089, respectively (Table S1). Finally, F-CFP and F-YFP and Mc-mCherry CDSs were PCR-amplified from, respectively, pPD136.61, pPD136.64 (Fire et al., 1990) and pAA64 (McNally et al, 2006), with

*Bam*HI-containing forward and *Kpn*I-containing reverse primers (data not shown), and cloned into the equivalent RE sites in pPD95.86 generating pNH074, pNH076 and pNH077 (Table S1).

Generation of T7<sup>PROM</sup>-tagged FP transcription templates, *in vitro* protein production and immunocapture of *in vitro*-expressed FPs

Linear dsDNA transcription templates, each containing a different, contiguous non-intron-containing FP CDS, were generated by PCR using, as template, pNH013 to pNH016 DNA (5 ng) (Table S1). PCRs were primed with ODNs 12036/12037 (Table S3) the latter introducing a T7<sup>PROM</sup> sequence in the 5' end of each amplicon. As a positive control an equivalent T7<sup>PROM</sup>-tagged transcription template, containing a contiguous eGFP CDS, was PCR-amplified using pEGFP-N1 (Clontech) DNA (5 ng) as template and primed with ODNs 12038/12039 (Table S3). Proteins were generated *in vitro* with a coupled transcription-translation system (TnT T7 Quick for PCR DNA, Promega), according to the manufacturer's protocol, using, as transcription template, an unpurified aliquot (5  $\mu$ l) from each completed PCR. To immunocapture *in vitro*-produced FPs an aliquot (5  $\mu$ l) from the corresponding transcription-translation reaction mix was incubated (16 h, 4<sup>o</sup>C on a rotary mixer) with Protein-G agarose beads (1  $\mu$ l, Protein-G agarose, Millipore) in buffer (PBS/0.2 % Triton X-100 (0.5 ml)) and an aliquot (0.25 ml) of the appropriate, undiluted polyclonal antibody (Living Colors full-length polyclonal antibody (Clontech) for mCerulean, mTFP1 and mCitrine, RFP/DsRed polyclonal antibody (MBL) for mCherry). Beads were pelleted, washed (3 x PBS/0.2 % Triton X-100), resuspended in wash buffer (0.1ml) and either imaged immediately or stored (4<sup>o</sup>C) as aliquots (5  $\mu$ l).

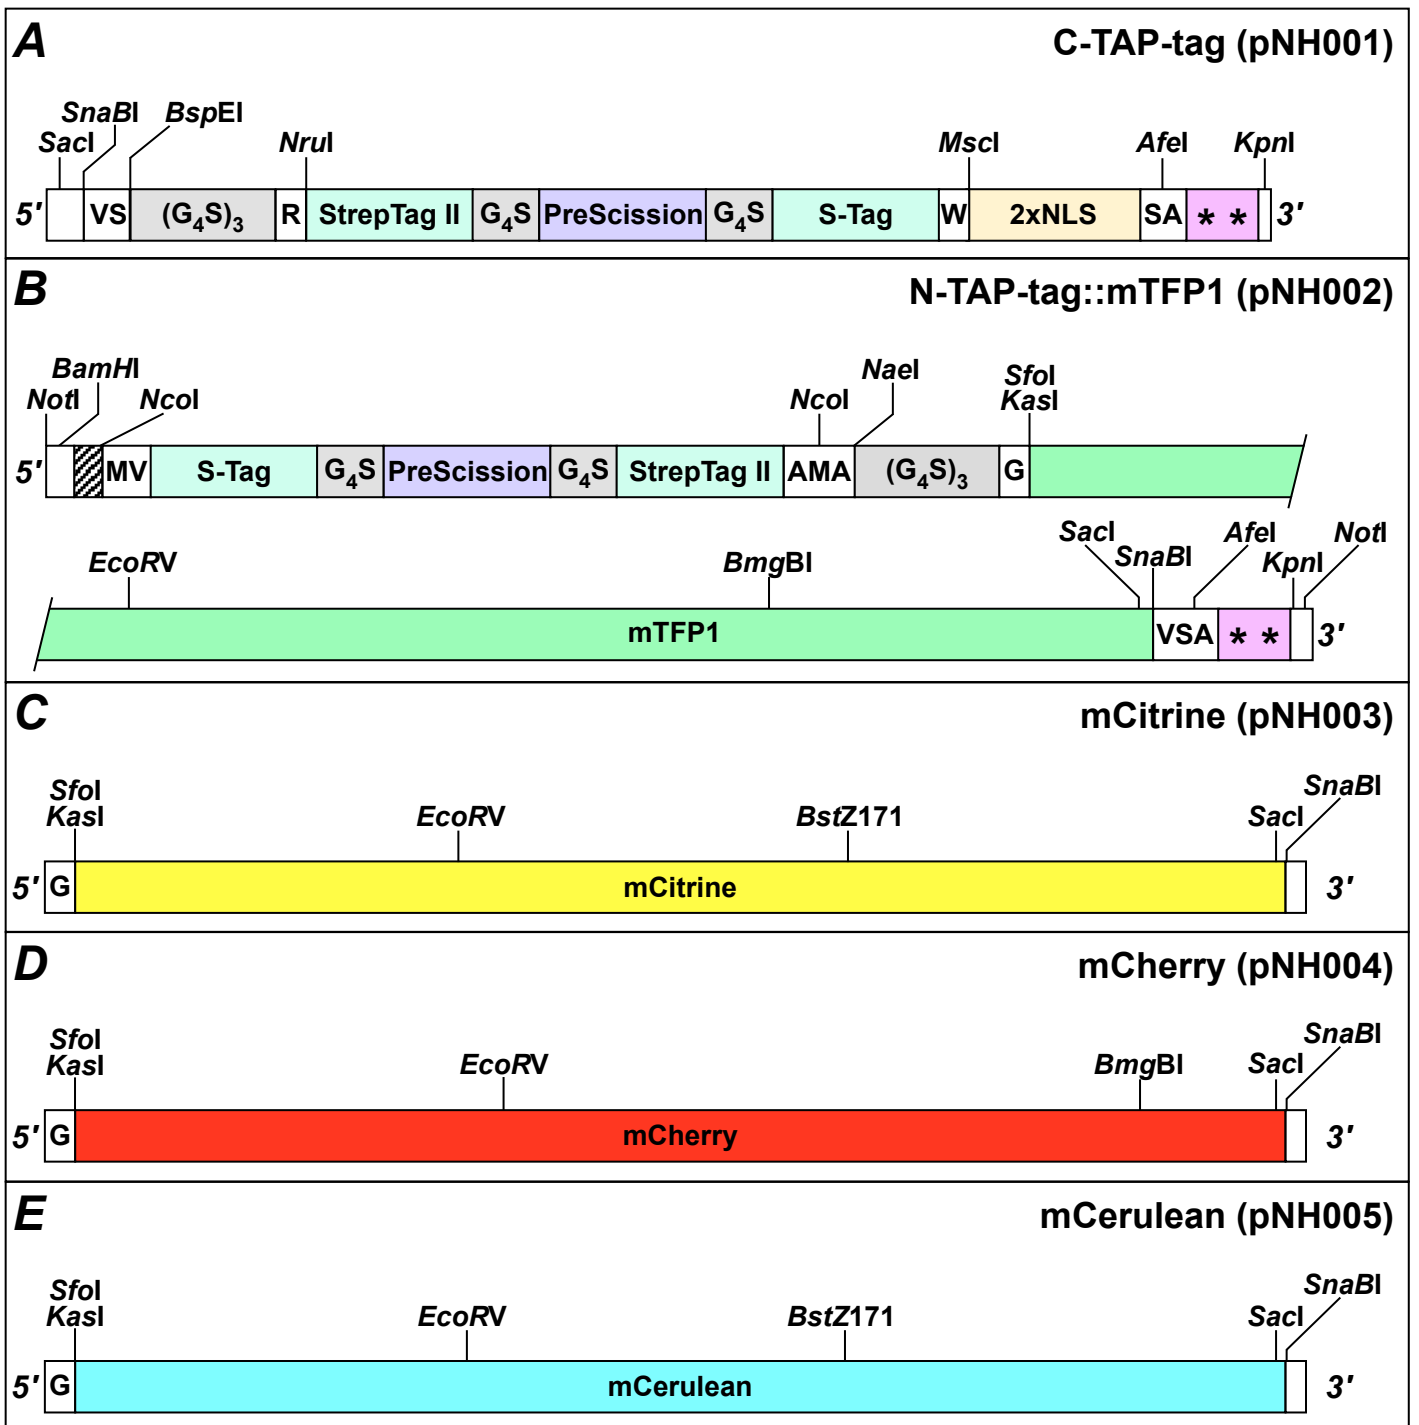

**Figure S1. Design and synthesis of fluorescent protein- and TAP-tag-encoding sequences.** Sequences encoding a C-terminal TAP-tag (Panel A), an N-terminal TAP-tag fused, in-frame, to mTFP1 (Panel B), mCitrine (Panel C), mCherry (Panel D) and mCerulean (Panel E) were designed (Gene Designer, DNA 2.0) prior to commercial synthesis. Both TAP-tags were designed with external S-Tag and internal StrepTag II affinity tags flanking a PreScission protease site. A  $(G_4S)_3$  linker unit was included in each TAP-tag to separate it from the FP and a pair of  $G_4S$  sequences flanked the PreScission site. The C-terminal TAP-tag included two in-frame stop codons (TAA-TAG) (asterisks) and a pair of nuclear-localization signals flanked by unique restriction sites. The N-TAP-tag included the translation initiation sequence *aaaaccATG* (hatched box, Panel B). Synthesized C-terminal TAP-tag and N-terminal TAP-tag::mTFP1 modules resulted in, respectively, plasmids pNH001 (Panel A) and pNH002 (Panel B). mCitrine, mCherry and mCerulean coding sequence units, each containing two unique blunt-cutting restriction enzyme sites to facilitate subsequent artificial intron insertion, were synthesized generating, respectively, plasmids pNH003 (Panel C), pNH004 (Panel D) and pNH005 (Panel E). In all sequences the inclusion of unique restriction enzyme sites, introduced to facilitate downstream sub-cloning and construct manipulation, occasionally required the introduction of one or more additional amino-acid residues absent from the native sequences (open boxes with single letter residues).

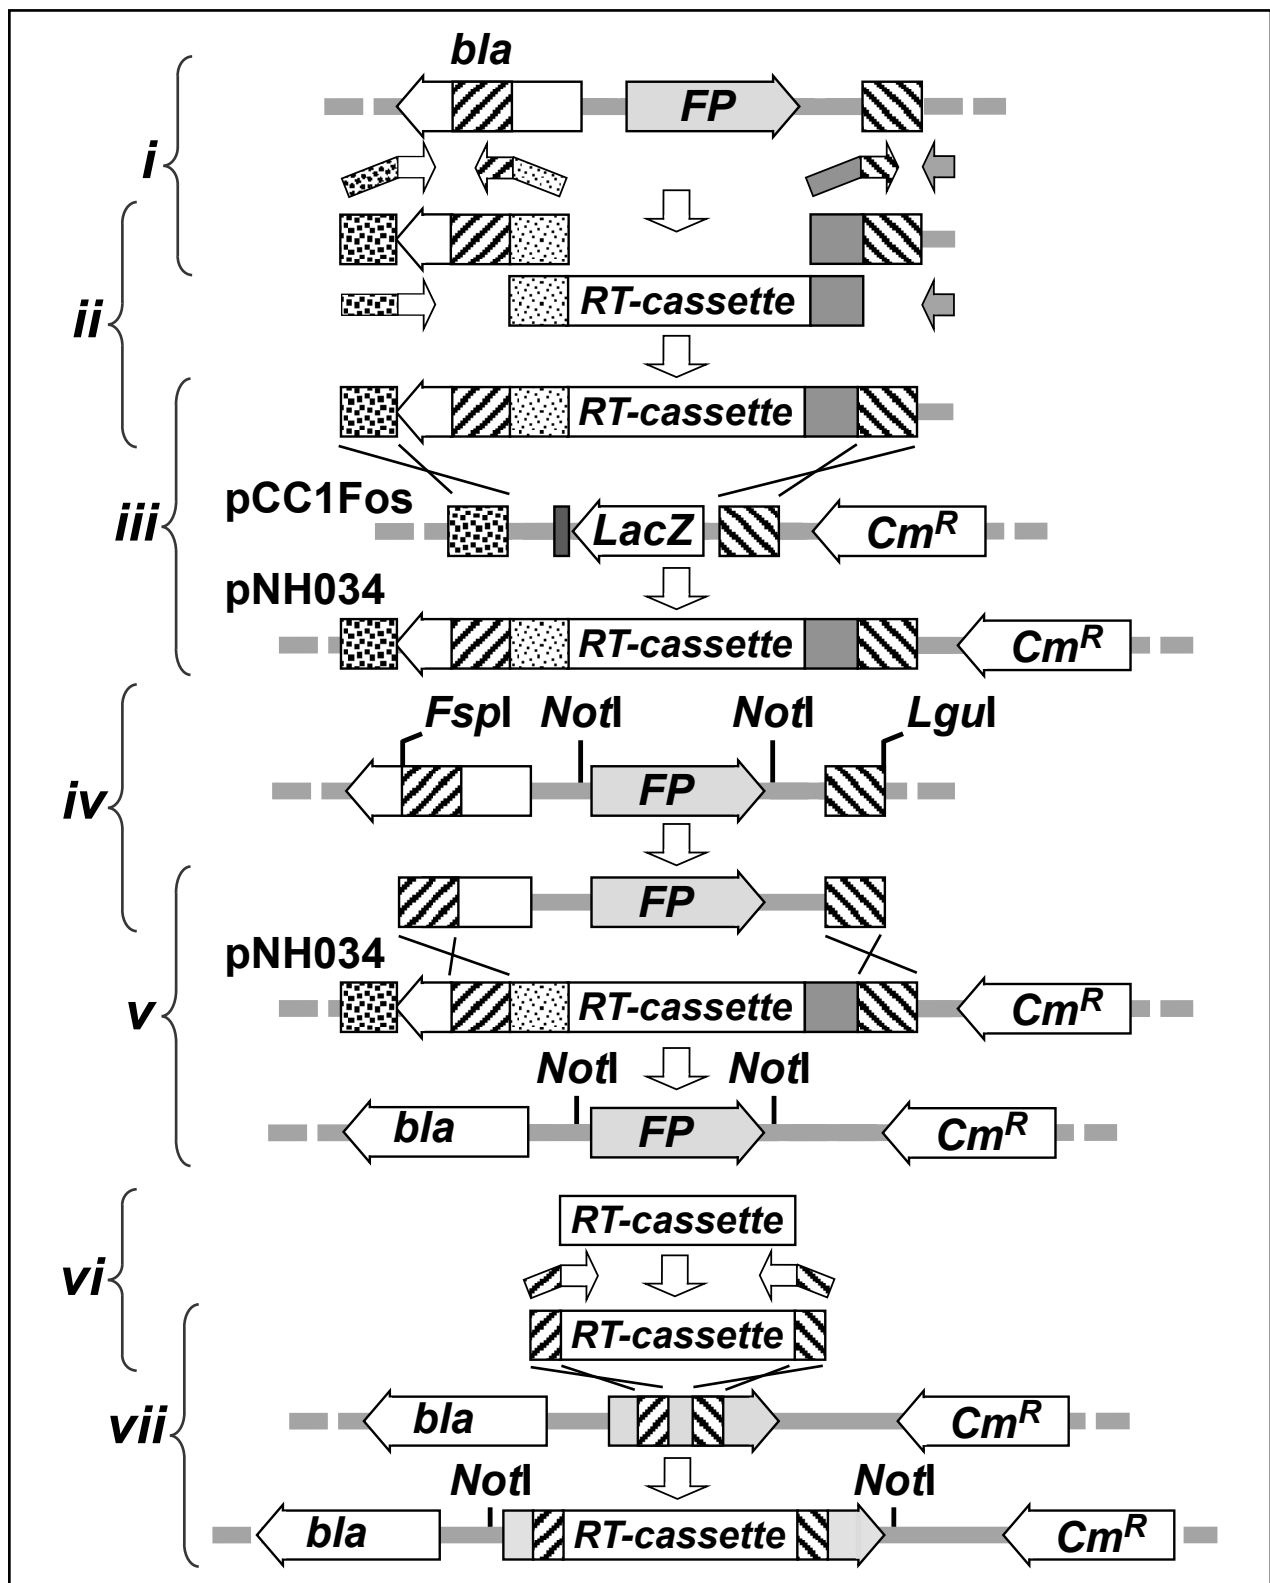

**Figure S2. Building a set of pCC1Fos-based recombinering resources based on the codon-optimized FP CDSs designed in the current study.** Two regions from the pGOv5 vector backbone were PCR-amplified generating amplicons that overlapped with a RT-cassette-containing sequence (i). The three segments were fused in a 3-way overlap-PCR to generate a single product containing terminal sequences homologous to two discrete regions within the fosmid vector pCC1Fos backbone (ii). This product was introduced into pCC1Fos, via positive selection recombinering, generating the construct pNH034 in which the *LacZ*- $\alpha$  and *loxP* sequences have been replaced with the RT-cassette and the 3' end of a  $\beta$ -lactamase (*bla*) coding region (iii). Contiguous or artificial intron-containing FP CDSs, excised as *FspI*-*LgI* fragments from the appropriate pGOv5-based construct (iv), each replaced, via positive selection recombinering, the RT-cassette generating a series of pNH034-derived constructs containing FP CDSs flanked by unique *NotI* sites enabling subsequent facile excision (v). Finally, a PCR-amplified RT-cassette (vi) was introduced into each of these constructs, via positive selection recombinering, replacing the central section of each FP CDS leaving approx. 200 bp 5' and 3' coding sections (vii). Figure not drawn to scale.

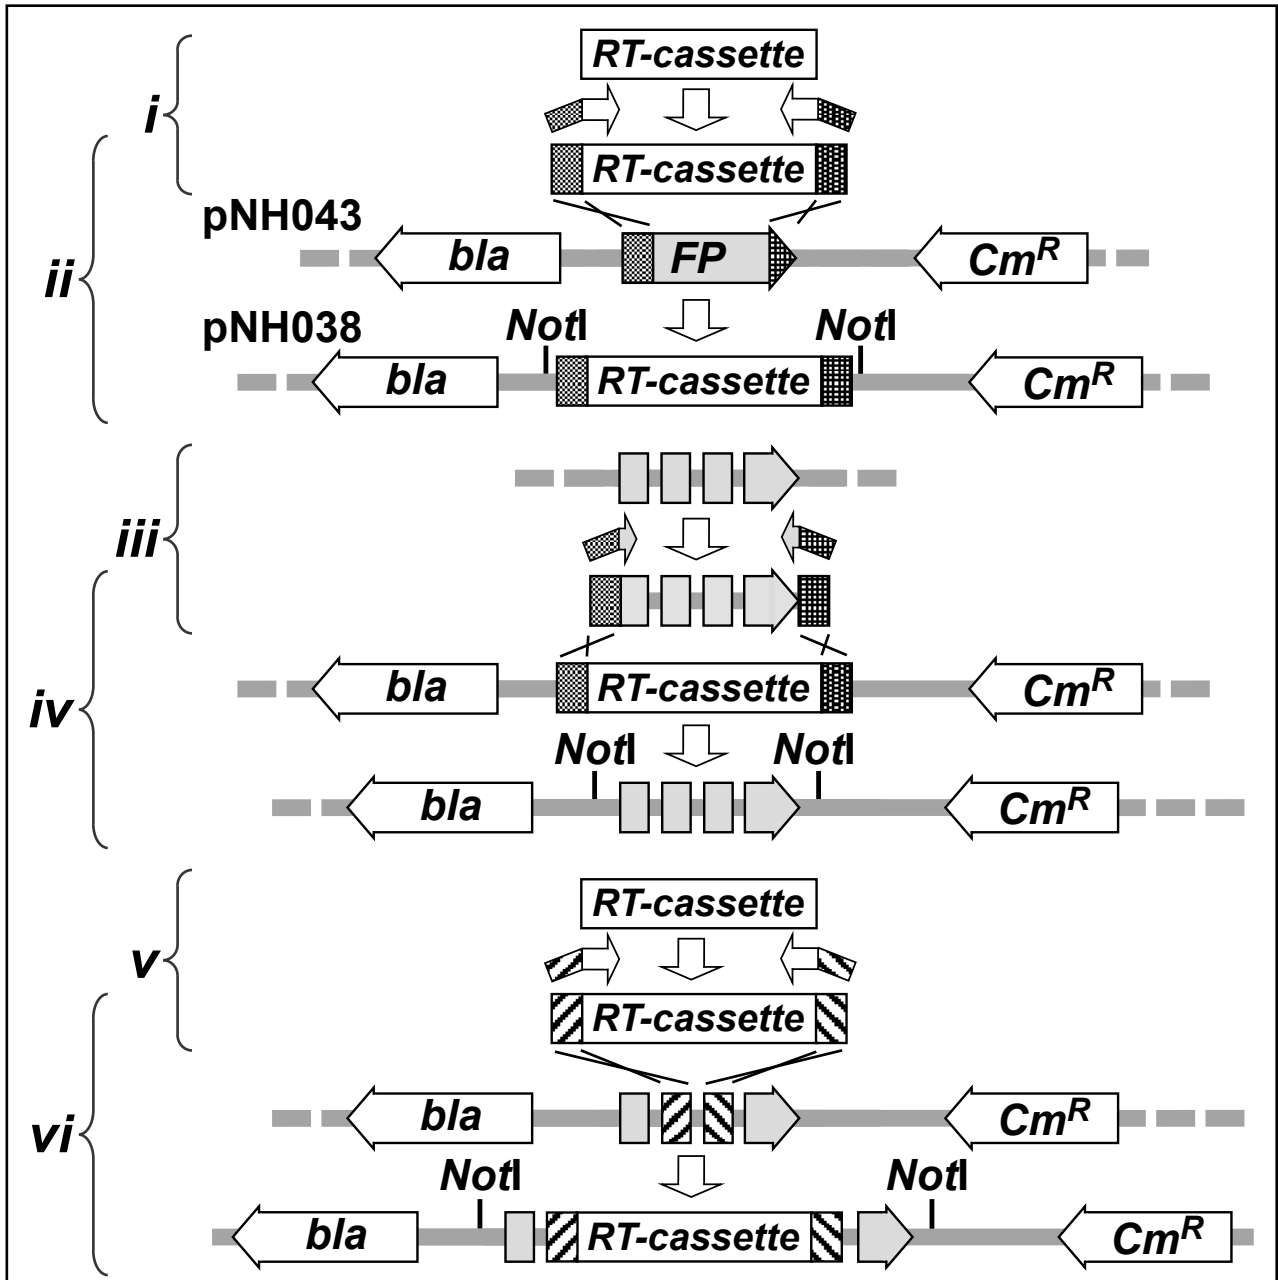

**Figure S3. Building a set of pCC1Fos-based recombinering resources for F-CFP, F-GFP, F-YFP and Mc-mCherry FP CDSs.** A PCR-amplified RT-cassette (i) was used to replace, *via* positive selection recombineering, the complete mTFP1 CDS present within the pCC1Fos-based construct pNH043 creating pNH038 in which the FP sequence is replaced by the RT-cassette but the useful flanking RE sites are retained (ii). Sequences encoding each of F-CFP, F-GFP, F-YFP and Mc-mCherry were PCR-amplified (iii), from appropriate vectors, and used to replace, *via* negative selection recombineering, the RT-cassette in pNH038 generating a series of pCC1Fos-based constructs containing NotI-flanked FP CDSs (iv). Finally, a PCR-amplified RT-cassette (v) was introduced, *via* positive selection recombineering, into each of these replacing the central section of each FP CDS leaving approx. 200 bp 5' and 3' coding sections (vi). Figure not drawn to scale.

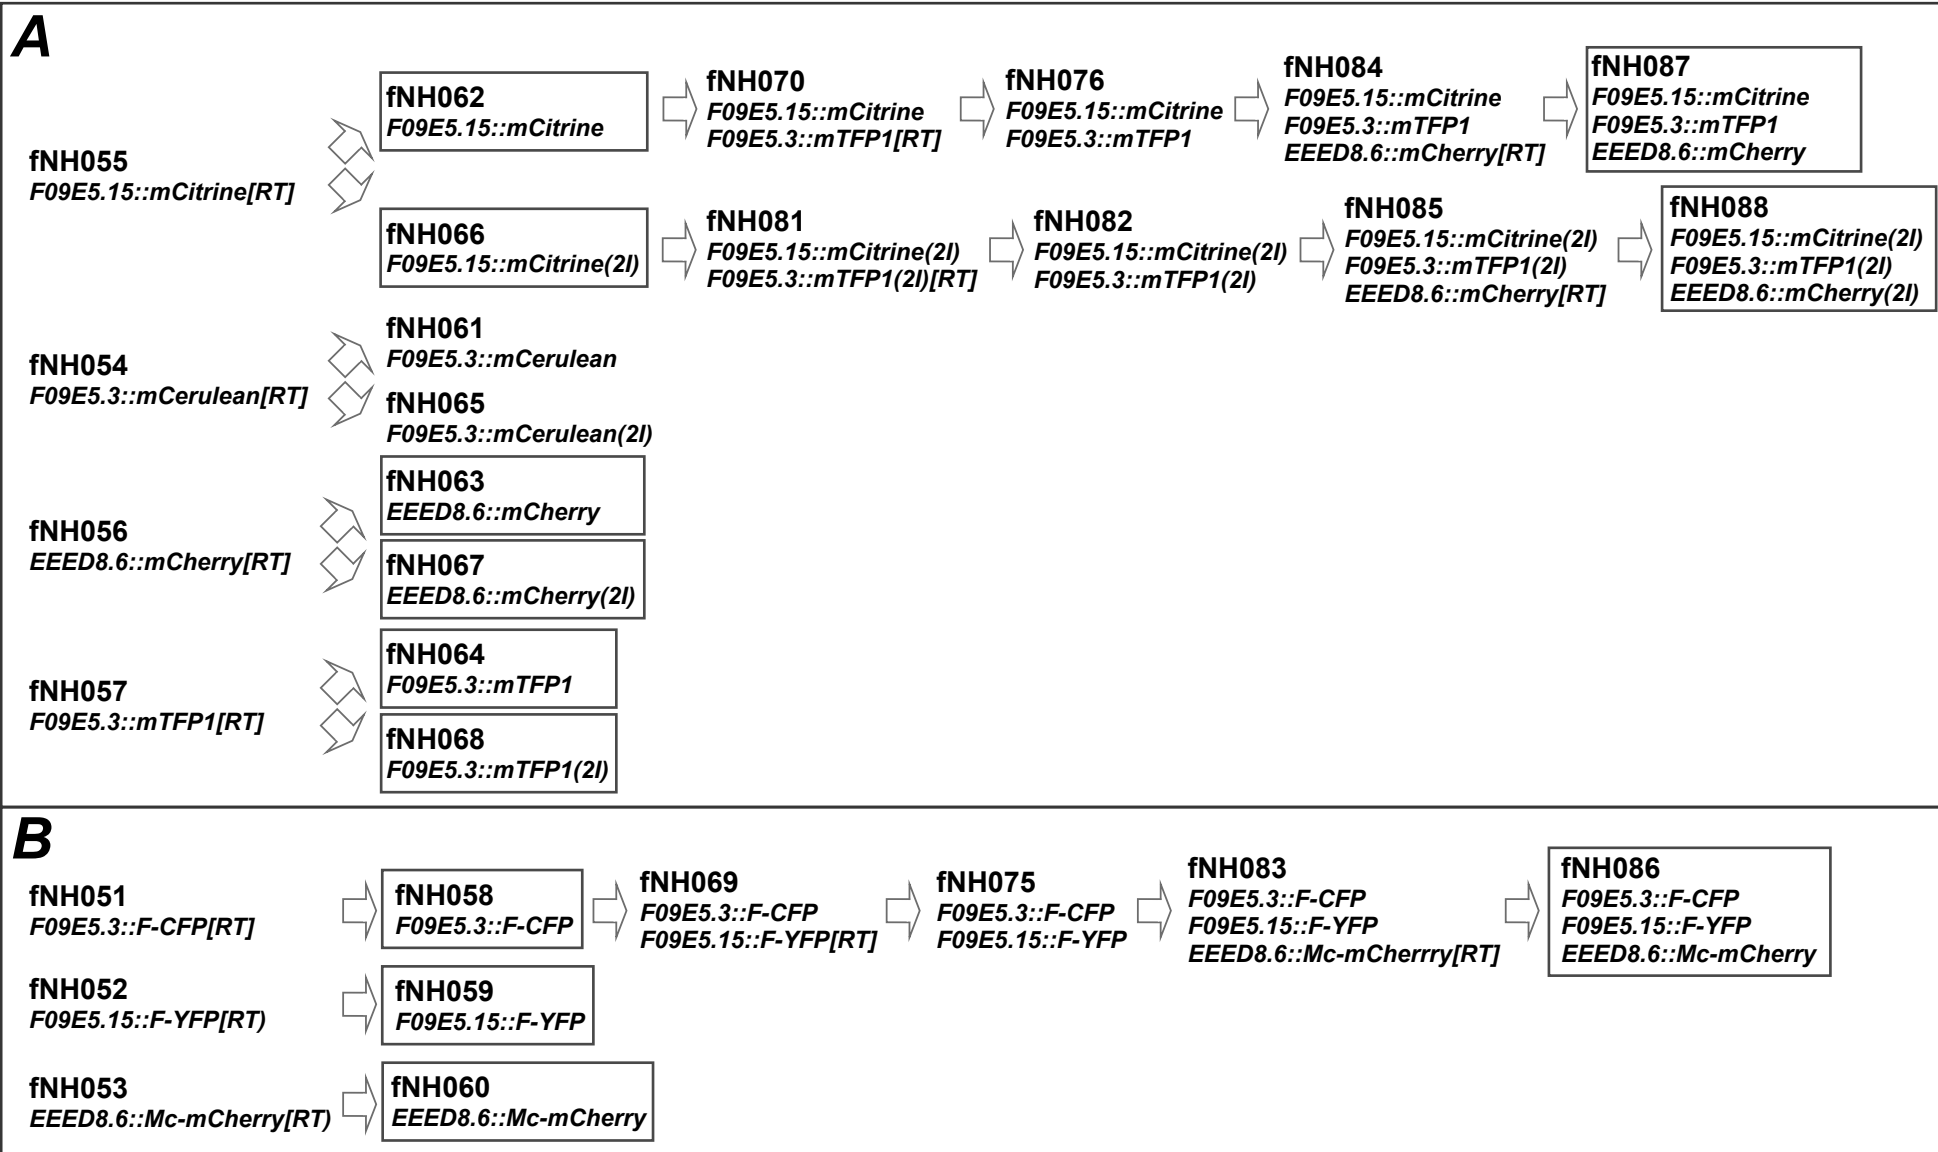

**Fig. S4. Fosmid WRM069dD11 counter-selection recombineering workflow.** FP CDSs, codon-optimized either as part of this work (Panel A) or by others (Mc-mCherry, [16]) (Panel B) or non-codon-optimized (F-CFP, F-YFP, [4]) (Panel B), were introduced into target genes within the fosmid clone WRM069dD11, via iterative rounds of counter-selection recombineering, generating single-, double and triple-tagged reporter constructs. Transgenic lines, created for some of these (boxed), were analyzed for FP reporter expression.



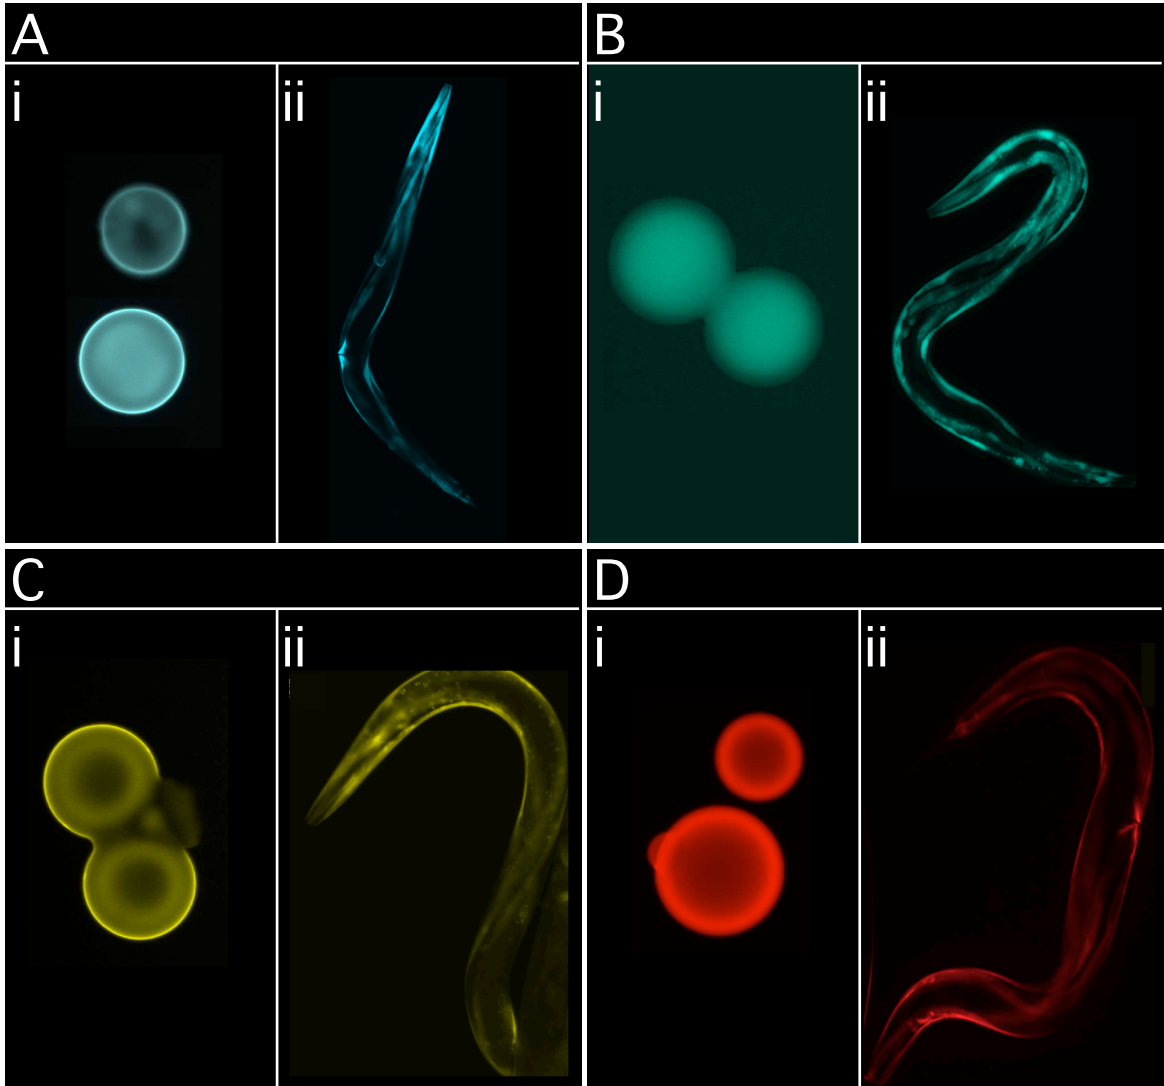

**Figure S5. *In vitro* immunocapture and *in vivo* expression of fluorescent proteins encoded by codon-optimized sequences specifically designed for this purpose.** Fluorescent proteins mCerulean, mTFP1, mCitrine and mCherry were generated by coupled *in vitro* transcription and translation and immunocaptured to G protein-agarose beads (panels *Ai* - *Di*, respectively). Images of mTFP1-coated beads (e.g. *Bi*) were consistently less sharp than for beads coated with the other fluorescent proteins. *C. elegans* strains, transformed with transgenes from pNH089, pNH086, pNH087 and pNH088 (Table S1) containing, respectively, coding sequences, each with two artificial introns encoding, mCerulean, mTFP1, mCitrine and mCherry (panels *Aii* - *Dii*), were examined for reporter expression. The *myo-3*<sup>PROM</sup>-driven transgenes directed diffuse reporter expression throughout body muscle cells consistent with the distribution of MYO-3. All images are 200x magnification.

**Table S1. pGOv5- and pPD95.86-based sub-clones**

| Construct | Insert                                                            | Vector   | Promoter     | NLS | Intron 1 <sup>d</sup> | Intron 2 <sup>d</sup> |
|-----------|-------------------------------------------------------------------|----------|--------------|-----|-----------------------|-----------------------|
| pNH001    | [(G <sub>4</sub> S) <sub>3</sub> ]::C-TAP-tag::2xNLS <sup>a</sup> | pGOv5    | -            | -   | -                     | -                     |
| pNH002    | N-TAP-tag::[(G <sub>4</sub> S) <sub>3</sub> ]::mTFP1 <sup>b</sup> | pGOv5    | -            | -   | -                     | -                     |
| pNH003    | mCitrine <sup>a, b</sup>                                          | pGOv5    | -            | -   | -                     | -                     |
| pNH004    | mCherry <sup>a, b</sup>                                           | pGOv5    | -            | -   | -                     | -                     |
| pNH005    | mCerulean <sup>a, b</sup>                                         | pGOv5    | -            | -   | -                     | -                     |
| pNH006    | N-TAP-tag::[(G <sub>4</sub> S) <sub>3</sub> ]::mCitrine           | pGOv5    | -            | -   | -                     | -                     |
| pNH007    | N-TAP-tag::[(G <sub>4</sub> S) <sub>3</sub> ]::mCherry            | pGOv5    | -            | -   | -                     | -                     |
| pNH008    | N-TAP-tag::[(G <sub>4</sub> S) <sub>3</sub> ]::mCerulean          | pGOv5    | -            | -   | -                     | -                     |
| pNH009    | N-TAP-tag::mTFP1                                                  | pGOv5    | -            | -   | -                     | -                     |
| pNH010    | N-TAP-tag::mCitrine                                               | pGOv5    | -            | -   | -                     | -                     |
| pNH011    | N-TAP-tag::mCherry                                                | pGOv5    | -            | -   | -                     | -                     |
| pNH012    | N-TAP-tag::mCerulean                                              | pGOv5    | -            | -   | -                     | -                     |
| pNH013    | mTFP1 <sup>c</sup>                                                | pGOv5    | -            | -   | -                     | -                     |
| pNH014    | mCitrine <sup>c</sup>                                             | pGOv5    | -            | -   | -                     | -                     |
| pNH015    | mCherry <sup>c</sup>                                              | pGOv5    | -            | -   | -                     | -                     |
| pNH016    | mCerulean <sup>c</sup>                                            | pGOv5    | -            | -   | -                     | -                     |
| pNH017    | mTFP1::[(G <sub>4</sub> S) <sub>3</sub> ]::C-TAP-tag::2xNLS       | pGOv5    | -            | Y   | -                     | -                     |
| pNH018    | mCitrine::[(G <sub>4</sub> S) <sub>3</sub> ]::C-TAP-tag::2xNLS    | pGOv5    | -            | Y   | -                     | -                     |
| pNH019    | mCherry::[(G <sub>4</sub> S) <sub>3</sub> ]::C-TAP-tag::2xNLS     | pGOv5    | -            | Y   | -                     | -                     |
| pNH020    | mCerulean::[(G <sub>4</sub> S) <sub>3</sub> ]::C-TAP-tag::2xNLS   | pGOv5    | -            | Y   | -                     | -                     |
| pNH022    | mTFP1::[(G <sub>4</sub> S) <sub>3</sub> ]::C-TAP-tag::2xNLS       | pPD95.86 | <i>myo-3</i> | Y   | -                     | -                     |
| pNH023    | mCitrine::[(G <sub>4</sub> S) <sub>3</sub> ]::C-TAP-tag::2xNLS    | pPD95.86 | <i>myo-3</i> | Y   | -                     | -                     |
| pNH024    | mCherry::[(G <sub>4</sub> S) <sub>3</sub> ]::C-TAP-tag::2xNLS     | pPD95.86 | <i>myo-3</i> | Y   | -                     | -                     |
| pNH025    | mCerulean::[(G <sub>4</sub> S) <sub>3</sub> ]::C-TAP-tag::2xNLS   | pPD95.86 | <i>myo-3</i> | Y   | -                     | -                     |
| pNH026    | mTFP1::[(G <sub>4</sub> S) <sub>3</sub> ]::C-TAP-tag              | pGOv5    | -            | -   | -                     | -                     |
| pNH027    | mCitrine::[(G <sub>4</sub> S) <sub>3</sub> ]::C-TAP-tag           | pGOv5    | -            | -   | -                     | -                     |
| pNH028    | mCherry::[(G <sub>4</sub> S) <sub>3</sub> ]::C-TAP-tag            | pGOv5    | -            | -   | -                     | -                     |
| pNH029    | mCerulean::[(G <sub>4</sub> S) <sub>3</sub> ]::C-TAP-tag          | pGOv5    | -            | -   | -                     | -                     |
| pNH030    | mTFP1::[(G <sub>4</sub> S) <sub>3</sub> ]::2xNLS                  | pGOv5    | -            | Y   | -                     | -                     |
| pNH031    | mCitrine::[(G <sub>4</sub> S) <sub>3</sub> ]::2xNLS               | pGOv5    | -            | Y   | -                     | -                     |
| pNH032    | mCherry::[(G <sub>4</sub> S) <sub>3</sub> ]::2xNLS                | pGOv5    | -            | Y   | -                     | -                     |
| pNH033    | mCerulean::[(G <sub>4</sub> S) <sub>3</sub> ]::2xNLS              | pGOv5    | -            | Y   | -                     | -                     |
| pNH035    | mCherry <sup>c</sup>                                              | pPD95.86 | <i>myo-3</i> | -   | -                     | -                     |
| pNH047    | mTFP1 <sup>c</sup>                                                | pPD95.86 | <i>myo-3</i> | -   | -                     | -                     |
| pNH048    | mCitrine <sup>c</sup>                                             | pPD95.86 | <i>myo-3</i> | -   | -                     | -                     |
| pNH049    | mCerulean <sup>c</sup>                                            | pPD95.86 | <i>myo-3</i> | -   | -                     | -                     |
| pNH074    | F-CFP <sup>e</sup>                                                | pPD95.86 | <i>myo-3</i> | -   | n/a                   | n/a                   |
| pNH075    | F-GFP <sup>e</sup>                                                | pPD95.86 | <i>myo-3</i> | -   | n/a                   | n/a                   |
| pNH076    | F-YFP <sup>e</sup>                                                | pPD95.86 | <i>myo-3</i> | -   | n/a                   | n/a                   |
| pNH077    | Mc-mCherry <sup>f</sup>                                           | pPD95.86 | <i>myo-3</i> | -   | n/a                   | n/a                   |
| pNH078    | mTFP1[1I] <sup>c</sup>                                            | pGOv5    | -            | -   | B                     | -                     |
| pNH079    | mCitrine[1I] <sup>c</sup>                                         | pGOv5    | -            | -   | α                     | -                     |
| pNH080    | mCherry[1I] <sup>c</sup>                                          | pGOv5    | -            | -   | β                     | -                     |
| pNH081    | mCerulean[1I] <sup>c</sup>                                        | pGOv5    | -            | -   | γ                     | -                     |
| pNH082    | mTFP1[2I] <sup>c</sup>                                            | pGOv5    | -            | -   | B                     | C                     |
| pNH083    | mCitrine[2I] <sup>c</sup>                                         | pGOv5    | -            | -   | α                     | D                     |
| pNH084    | mCherry[2I] <sup>c</sup>                                          | pGOv5    | -            | -   | β                     | E                     |
| pNH085    | mCerulean[2I] <sup>c</sup>                                        | pGOv5    | -            | -   | γ                     | F                     |
| pNH086    | mTFP1[2I] <sup>c</sup>                                            | pPD95.86 | <i>myo-3</i> | -   | B                     | C                     |
| pNH087    | mCitrine[2I] <sup>c</sup>                                         | pPD95.86 | <i>myo-3</i> | -   | α                     | D                     |
| pNH088    | mCherry[2I] <sup>c</sup>                                          | pPD95.86 | <i>myo-3</i> | -   | β                     | E                     |
| pNH089    | mCerulean[2I] <sup>c</sup>                                        | pPD95.86 | <i>myo-3</i> | -   | γ                     | F                     |

<sup>a</sup> Lacks intact open-reading frame; <sup>b</sup> FP sequence lacks N-terminal Met-Val and C-terminal Lys residues present in native sequence; <sup>c</sup> N-terminal Met-Val residues and C-terminal Lys residue, present in native coding sequence, replaced, respectively, with Met-Ala-Ala and Val-Ser-Ala; <sup>d</sup> See Table S1 for intron sequences; <sup>e</sup> contains 3 introns [4]; <sup>f</sup> contains 3 introns [16]; n/a – not applicable

**Table S2. Artificial intron sequences<sup>a</sup>**

| ODNs | Sequence (5'-3')                      |          | Intron Sequence (5'-3')                              |
|------|---------------------------------------|----------|------------------------------------------------------|
| 4482 | GTAAGTTTAAACAGATCCATACTAACTAAGTTGTTTC |          |                                                      |
| 4483 | CTGAAAATTATGTCAGAACAAGTTAGTTAGTATGGA  | B        | GTAAGTTTAAACAGATCCATACTAACTAAGTTGTTCTGACATAATTTTCAG  |
| 4484 | GTAAGTTTAAACATATATATACTAACTAACCCCTGAT |          |                                                      |
| 4485 | CTGAAAATTTAAATAATCAGGGTTAGTTAGTATATA  | $\alpha$ | GTAAGTTTAAACATATATATACTAACTAACCCCTGATTATTTAAATTTTCAG |
| 4486 | GTAAGTTTAAACAGTTCGGTACTAACTAACCATACA  |          |                                                      |
| 4487 | CTGAAAATTTAAATATGTATGGTTAGTTAGTACCGA  | $\beta$  | GTAAGTTTAAACAGTTCGGTACTAACTAACCATACATATTTAAATTTTCAG  |
| 4488 | GTAAGTTTAAACATGATTTTACTAACTAACTAATCT  |          |                                                      |
| 4489 | CTGAAAATTTAAATCAGATTAGTTAGTTAGTAAAAT  | $\gamma$ | GTAAGTTTAAACATGATTTTACTAACTAACTAATCTGATTTAAATTTTCAG  |
| 4490 | GTAAGTTTAAATTAAGTTGATACTAACTAACAAAGAT |          |                                                      |
| 4491 | CTGAAAATTAATCAGATCTTTGTTAGTTAGTATCAA  | C        | GTAAGTTTAAATTAAGTTGATACTAACTAACAAAGATCTGATTAATTTTCAG |
| 4492 | GTAAGTTTAAACAGGATCTTACTAACTAACATGCTA  |          |                                                      |
| 4493 | CTGAAAATTCAGTGTTAGCATGTTAGTTAGTAAGAT  | D        | GTAAGTTTAAACAGGATCTTACTAACTAACATGCTAACACTGAATTTTCAG  |
| 4494 | GTAAGTTTAAACTATTCGTTACTAACTAACTTTAAA  |          |                                                      |
| 4495 | CTGAAAATTTAAATGTTTAAAGTTAGTTAGTAACGA  | E        | GTAAGTTTAAACTATTCGTTACTAACTAACTTTAAACATTTAAATTTTCAG  |
| 4496 | GTAAGTTTAAACAGTTGAATACTAACTAACGGAGAT  |          |                                                      |
| 4497 | CTGAAAATTTCAAAGATCTCCGTTAGTTAGTATTCA  | F        | GTAAGTTTAAACAGTTGAATACTAACTAACGGAGATCTTTGAAATTTTCAG  |

<sup>a</sup> For each pair of ODNs the corresponding intron formed following annealing and extension is indicated alongside.

**Table S3. Oligonucleotide sequences**

| No    | sequence (5'-3') <sup>a</sup>                                                           |
|-------|-----------------------------------------------------------------------------------------|
| 12015 | ccgggctgcatccgatgcaagtgtgctgctgtcgacgagctcgcgagctcGTCTGACGCTCAGTGGAACGAAAACTCAC         |
| 12016 | gtgaacaccgcatatctcgacagcgaccatggAGTGTGCCATAACCATGAGTGATAAC                              |
| 12017 | ccaattctcatgtttgacagcttatcatcccattggGCTGAGGGGCTGGCCGCTCACAATTC                          |
| 12018 | CGCGTTGGCCGATTCAATTAATGCAGC                                                             |
| 12024 | accgctacacttgccagcccctcagcgcggccgctagcggatccttaaaaGCTGTGCGAGATATGACGGTGTTC              |
| 12025 | atggtgtgtggaattgtgagcggccagcccctcagcgcggccgctagcggatccttaaaaATGGTCTCAAAGGGTGAAGAAGATA   |
| 12026 | accgctacacttgccagcccctcagcgcggccgctagcggatccttaaaaATGGTCTCAAAGGGTGAAGAAGATA             |
| 12027 | atggtgtgtggaattgtgagcggccagcccctcagcgcggccgctagcggatccttaaaaATGGTCTCAAAGGGTGAAGAAGATA   |
| 12028 | accgctacacttgccagcccctcagcgcggccgctagcggatccttaaaaATGAGTAAAGGAGAAGAAGACTTTTCA           |
| 12029 | atggtgtgtggaattgtgagcggccagcccctcagcgcggccgctagcggatccttaaaaATGAGTAAAGGAGAAGAAGACTTTTCA |
| 12030 | tactaactaacctgattatttaattttcagccaacactgtcactactGCTGTGCGAGATATGACGGTGTTC                 |
| 12031 | acgcttccatcttcaatggtgtgctaaattttgaagttctgaaaatttaTCTTGGAGTGGTGAATCCGTTAGC               |
| 12032 | attattttaaattttcaggttaactaaaggcggaccattaccattcgcctggGCTGTGCGAGATATGACGGTGTTC            |
| 12033 | gattagttagttagtaaaatcatgttttaacttacctcagcatcgtaagtTCTTGGAGTGGTGAATCCGTTAGC              |
| 12036 | GTATGTTGTGTTGGAATTGTGAGCGG                                                              |
| 12037 | GCAGCTAATACGACTCACTATAGGGTGTGGTGGTTACGCGCAGCGTGA                                        |
| 12038 | GCAGCTAATACGACTCACTATAGGTTACCGCCGCCACCATGGTGAGCAAGGGCGAGGAGCTGT                         |
| 12039 | CTCTACAAATGTGGTATGGCTGATT                                                               |
| 12042 | tactacagccttcgcatatggaatcgcagcattcacaataaccagacgGCTGTGCGAGATATGACGGTGTTC                |
| 12043 | ccaacaacagtttatgcttcacgtcacctttcaaaactccatctctgacaTCTTGGAGTGGTGAATCCGTTAGC              |
| 12044 | atatggcttgatgtgtttcgaagatatccagatcacatgaagcaacacgGCTGTGCGAGATATGACGGTGTTC               |
| 12045 | cttccatctcgcagttgtgacggattttgaaattaactttaattccgttTCTTGGAGTGGTGAATCCGTTAGC               |
| 12046 | gtctccacagtttatgtacggttcgaagccatggttaagcatccggcggGCTGTGCGAGATATGACGGTGTTC               |
| 12047 | tgagcttaagtcggttctttatttctcccttaagaccgctcctctgggTCTTGGAGTGGTGAATCCGTTAGC                |
| 12048 | atgggggtgtccaatgctttgctagatatccagaccatgaaacagcatgGCTGTGCGAGATATGACGGTGTTC               |
| 12049 | gaaccgtcttcaatattatgtctaactttaaagttggccttgataccattTCTTGGAGTGGTGAATCCGTTAGC              |
| 12074 | ggctcaatcctcacttgttccgcacatcggagctagcagctctcttgatgatATGAGTAAAGGAGAAGAAGACTTTTC          |
| 12075 | aacaaaaaaaaaagatgataacaaaaactgatctaaagacccttcagacaTTTGTATAGTTTATCCATGCCATG              |
| 12076 | ggactccagatccgacaccatcaagccaggagtcaaagaaagccaagagATGAGTAAAGGAGAAGAAGACTTTTC             |
| 12077 | gggatacgggggaaattagagatgtaagacatttagtgcttcttgaagtaTTTGTATAGTTTATCCATGCCATG              |
| 12078 | ccgcccgcgccagaaaaactttgaaaaagcaagcgaggaaggtgattcagATGGTCTCAAAGGGTGAAGAAGAT              |
| 12079 | tggctctttatcagttctaattgtgggcgccaattcatttcatcatcacagtGGATCCACTAGTCTTATACAATTC            |
| 12082 | ggactccagatccgacaccatcaagccaggagtcaaagaaagccaagagATGGCCGCCAGTAAAGGGTGAAGGAG             |
| 12083 | gggatacgggggaaattagagatgtaagacatttagtgcttcttgaagtaTTAAGCGCTTACGTAGAGCTCATC              |
| 12084 | ccgcccgcgccagaaaaactttgaaaaagcaagcgaggaaggtgattcagATGGCCGCCAGTAAAGGGTGAAGGAG            |
| 12085 | tggctctttatcagttctaattgtgggcgccaattcatttcatcatcacagtTTAAGCGCTTACGTAGAGCTCATC            |
| 12086 | ggctcaatcctcacttgttccgcacatcggagctagcagctctcttgatgatATGGCCGCCCTAAAAGGAGAAGAA            |
| 12087 | aacaaaaaaaaaagatgataacaaaaactgatctaaagacccttcagacaTTAAGCGCTTACGTAGAGCTCGTC              |

<sup>a</sup>For ODNs used in recombineering procedures the homology arm and template annealing sequences are given in lower and upper case, respectively. Premature stop codons in the reverse ODNs 12083, 12085 and 12087 are underlined.

**Table S4. Generation of pCC1Fos-based constructs**

| Construct <sup>a</sup> | Insert sequence <sup>b</sup>                             | Source <sup>c</sup> | RT-cassette <sup>d</sup> | ODNs <sup>e</sup> |
|------------------------|----------------------------------------------------------|---------------------|--------------------------|-------------------|
| pNH043                 | mTFP1                                                    | pNH013              | pNH054                   | 12042,12043       |
| pNH044                 | mCitrine                                                 | pNH014              | pNH055                   | 12044,12045       |
| pNH045                 | mCherry                                                  | pNH015              | pNH056                   | 12046,12047       |
| pNH046                 | mCerulean                                                | pNH016              | pNH057                   | 12048,12049       |
| pNH058                 | N-TAP-tag::mTFP1                                         | pNH002              | pNH066                   | 12042,12043       |
| pNH059                 | N-TAP-tag::mCitrine                                      | pNH006              | pNH067                   | 12044,12045       |
| pNH060                 | N-TAP-tag::mCherry                                       | pNH007              | pNH068                   | 12046,12047       |
| pNH061                 | N-TAP-tag::mCerulean                                     | pNH008              | pNH069                   | 12048,12049       |
| pNH062                 | mTFP1::C-TAP-tag::2xNLS                                  | pNH017              | pNH070                   | 12042,12043       |
| pNH063                 | mCitrine::C-TAP-tag::2xNLS                               | pNH018              | pNH071                   | 12044,12045       |
| pNH064                 | mCherry::C-TAP-tag::2xNLS                                | pNH019              | pNH072                   | 12046,12047       |
| pNH065                 | mCerulean::C-TAP-tag::2xNLS                              | pNH020              | pNH073                   | 12048,12049       |
| pNH090                 | mTFP1::[(G <sub>4</sub> S) <sub>3</sub> ]::C-TAP-tag     | pNH026              | pNH094                   | 12042,12043       |
| pNH091                 | mCitrine::[(G <sub>4</sub> S) <sub>3</sub> ]::C-TAP-tag  | pNH027              | pNH095                   | 12044,12045       |
| pNH092                 | mCherry::[(G <sub>4</sub> S) <sub>3</sub> ]::C-TAP-tag   | pNH028              | pNH096                   | 12046,12047       |
| pNH093                 | mCerulean::[(G <sub>4</sub> S) <sub>3</sub> ]::C-TAP-tag | pNH029              | pNH097                   | 12048,12049       |
| pNH039                 | F-CFP                                                    | 12028/12029         | pNH050                   | 12030/12031       |
| pNH040                 | F-GFP                                                    | 12028/12029         | pNH051                   | 12030/12031       |
| pNH041                 | F-YFP                                                    | 12028/12029         | pNH052                   | 12030/12031       |
| pNH042                 | Mc-mCherry                                               | 12026/12027         | pNH053                   | 12032/12033       |

<sup>a</sup> pCC1Fos-based construct generated; <sup>b</sup> final inserted sequence; <sup>c</sup> source of insert sequence - either a *FspI*-*LguI* restriction fragment from donor clone (Table S1) or a PCR product generated with the indicated ODN pair (Table S3); <sup>d</sup> Corresponding sub-clone fitted with RT-cassette; <sup>e</sup> RT-cassette generated by PCR-amplification with this ODN pair (Table S3)

**Table S5. Fosmid WRM069dD11 counter-selection recombineering: ODNs and RT-cassettes**

| Target gene <sup>a</sup>   | Insertion sequence <sup>b</sup> | ODNs <sup>c</sup> |       | Selection cassette <sup>d</sup> | Replacement cassette <sup>e</sup> |
|----------------------------|---------------------------------|-------------------|-------|---------------------------------|-----------------------------------|
|                            |                                 | Fwd               | Rev   |                                 |                                   |
| F09E5.3                    | F-CFP                           | 12074             | 12075 | pNH050                          | pNH039                            |
| F09E5.15 ( <i>prdx-2</i> ) | F-YFP                           | 12076             | 12077 | pNH052                          | pNH041                            |
| EEED8.6 ( <i>ccpp-6</i> )  | Mc-mCherry                      | 12078             | 12079 | pNH053                          | pNH042                            |
| F09E5.3                    | mTFP1                           | 12086             | 12087 | pNH054                          | pNH013                            |
| F09E5.15 ( <i>prdx-2</i> ) | mCitrine                        | 12082             | 12083 | pNH055                          | pNH014                            |
| EEED8.6 ( <i>ccpp-6</i> )  | mCherry                         | 12084             | 12085 | pNH056                          | pNH015                            |
| F09E5.3                    | mTFP1(2I)                       | 12086             | 12087 | pNH054                          | pNH086                            |
| F09E5.15 ( <i>prdx-2</i> ) | mCitrine(2I)                    | 12082             | 12083 | pNH055                          | pNH087                            |
| EEED8.6 ( <i>ccpp-6</i> )  | mCherry(2I)                     | 12084             | 12085 | pNH056                          | pNH088                            |

<sup>a</sup> Gene targets in fosmid genomic clone WRM069dD11; <sup>b</sup> FP CDS to be inserted; <sup>c</sup> ODNs designed to PCR-amplify counter-selection RT-cassette (see Table S3 for sequences); <sup>d</sup> PCR performed using, as template, the RT-cassette-containing *NoI*-*NoI* fragment excised from this construct (also see Table 2); <sup>e</sup> *NoI*-*NoI* fragment containing the FP CDS replacement cassette excised from this construct.

**Table S6. pCC1Fos-based resources for counter-selection recombineering**

| Sequence to be inserted <sup>a</sup>                            | RT-cassette <sup>b</sup> |                 |                             |                              | Replacement cassette <sup>c</sup> |                     |                 |
|-----------------------------------------------------------------|--------------------------|-----------------|-----------------------------|------------------------------|-----------------------------------|---------------------|-----------------|
|                                                                 | RT                       | kb <sup>d</sup> | Fwd (5'-3') <sup>e</sup>    | Rev (5'-3') <sup>e</sup>     | pCC1Fos-based                     | pGOv5-based         | kb <sup>d</sup> |
| RT-cassette                                                     | pNH034                   | 2.0             | GCTGTCGAGATATGACGGTGTTC     | TCTTGGAGTGGTGAATCCGTTAGC     | -                                 | -                   | -               |
| F-CFP <sup>f</sup>                                              | pNH050                   | 2.4             | ATGAGTAAAGGAGAAGAAGAACTTTTC | [*]TTTGTATAGTTTCATCCATGCCATG | pNH039                            | n/a                 | 0.9             |
| F-GFP <sup>f</sup>                                              | pNH051                   | 2.4             | ATGAGTAAAGGAGAAGAAGAACTTTTC | [*]TTTGTATAGTTTCATCCATGCCATG | pNH040                            | n/a                 | 0.9             |
| F-YFP <sup>f</sup>                                              | pNH052                   | 2.4             | ATGAGTAAAGGAGAAGAAGAACTTTTC | [*]TTTGTATAGTTTCATCCATGCCATG | pNH041                            | n/a                 | 0.9             |
| Mc-mCherry <sup>g</sup>                                         | pNH053                   | 2.4             | ATGGTCTCAAAGGGTGAAGAAGAT    | [*]GGATCCACTAGTCTTATACAATTC  | pNH042                            | n/a                 | 0.9             |
| mTFP1                                                           | pNH054                   | 2.4             | ATGGCCGCCTCAAAGGAGAAGAA     | [*]AGCGCTTACGTAGAGCTCGTCCAT  | pNH043                            | pNH013              | 0.7             |
| mCitrine                                                        | pNH055                   | 2.4             | ATGGCCGCCAGTAAGGGTGAGGAG    | [*]AGCGCTTACGTAGAGCTCATCCAT  | pNH044                            | pNH014              | 0.7             |
| mCherry                                                         | pNH056                   | 2.4             | ATGGCCGCCAGTAAGGGTGAGGAG    | [*]AGCGCTTACGTAGAGCTCATCCAT  | pNH045                            | pNH015              | 0.7             |
| mCerulean                                                       | pNH057                   | 2.4             | ATGGCCGCCTCAAAGGAGAAGAA     | [*]AGCGCTTACGTAGAGCTCGTCCAT  | pNH046                            | pNH016              | 0.7             |
| N-TAP-tag::[(G <sub>4</sub> S) <sub>3</sub> ]::mTFP1            | pNH066                   | 2.6             | ATGGTTAAAGAAACAGCAGCAGCG    | [*]AGCGCTTACGTAGAGCTCGTCCAT  | pNH058                            | pNH002              | 0.9             |
| N-TAP-tag::[(G <sub>4</sub> S) <sub>3</sub> ]::mCitrine         | pNH067                   | 2.6             | ATGGTTAAAGAAACAGCAGCAGCG    | [*]AGCGCTTACGTAGAGCTCATCCAT  | pNH059                            | pNH006              | 0.9             |
| N-TAP-tag::[(G <sub>4</sub> S) <sub>3</sub> ]::mCherry          | pNH068                   | 2.6             | ATGGTTAAAGAAACAGCAGCAGCG    | [*]AGCGCTTACGTAGAGCTCATCCAT  | pNH060                            | pNH007              | 0.9             |
| N-TAP-tag::[(G <sub>4</sub> S) <sub>3</sub> ]::mCerulean        | pNH069                   | 2.6             | ATGGTTAAAGAAACAGCAGCAGCG    | [*]AGCGCTTACGTAGAGCTCGTCCAT  | pNH061                            | pNH008              | 0.9             |
| mTFP1::[(G <sub>4</sub> S) <sub>3</sub> ]::C-TAP-tag::2xNLS     | pNH070                   | 2.6             | ATGGCCGCCTCAAAGGAGAAGAA     | [*]AGCGCTAAGTTTTCGCTTCTTCTT  | pNH062                            | pNH017              | 0.95            |
| mCitrine::[(G <sub>4</sub> S) <sub>3</sub> ]::C-TAP-tag::2xNLS  | pNH071                   | 2.6             | ATGGCCGCCAGTAAGGGTGAGGAG    | [*]AGCGCTAAGTTTTCGCTTCTTCTT  | pNH063                            | pNH018              | 0.95            |
| mCherry::[(G <sub>4</sub> S) <sub>3</sub> ]::C-TAP-tag::2xNLS   | pNH072                   | 2.6             | ATGGCCGCCAGTAAGGGTGAGGAG    | [*]AGCGCTAAGTTTTCGCTTCTTCTT  | pNH064                            | pNH019              | 0.95            |
| mCerulean::[(G <sub>4</sub> S) <sub>3</sub> ]::C-TAP-tag::2xNLS | pNH073                   | 2.6             | ATGGCCGCCTCAAAGGAGAAGAA     | [*]AGCGCTAAGTTTTCGCTTCTTCTT  | pNH065                            | pNH020              | 0.95            |
| mTFP1::[(G <sub>4</sub> S) <sub>3</sub> ]::C-TAP-tag            | pNH094                   | 2.3             | ATGGCCGCCTCAAAGGAGAAGAA     | [*]AGCCCATGAGTCCATATGCTGTCT  | pNH090                            | pNH026              | 0.9             |
| mCitrine::[(G <sub>4</sub> S) <sub>3</sub> ]::C-TAP-tag         | pNH095                   | 2.3             | ATGGCCGCCAGTAAGGGTGAGGAG    | [*]AGCCCATGAGTCCATATGCTGTCT  | pNH091                            | pNH027              | 0.9             |
| mCherry::[(G <sub>4</sub> S) <sub>3</sub> ]::C-TAP-tag          | pNH096                   | 2.3             | ATGGCCGCCAGTAAGGGTGAGGAG    | [*]AGCCCATGAGTCCATATGCTGTCT  | pNH092                            | pNH028              | 0.9             |
| mCerulean::[(G <sub>4</sub> S) <sub>3</sub> ]::C-TAP-tag        | pNH097                   | 2.3             | ATGGCCGCCTCAAAGGAGAAGAA     | [*]AGCCCATGAGTCCATATGCTGTCT  | pNH093                            | pNH029              | 0.9             |
| mTFP1::[(G <sub>4</sub> S) <sub>3</sub> ]::2xNLS                | pNH070                   | 2.6             | ATGGCCGCCTCAAAGGAGAAGAA     | [*]AGCGCTAAGTTTTCGCTTCTTCTT  | n/a                               | pNH030 <sup>h</sup> | 0.8             |
| mCitrine::[(G <sub>4</sub> S) <sub>3</sub> ]::2xNLS             | pNH071                   | 2.6             | ATGGCCGCCAGTAAGGGTGAGGAG    | [*]AGCGCTAAGTTTTCGCTTCTTCTT  | n/a                               | pNH031 <sup>h</sup> | 0.8             |
| mCherry::[(G <sub>4</sub> S) <sub>3</sub> ]::2xNLS              | pNH072                   | 2.6             | ATGGCCGCCAGTAAGGGTGAGGAG    | [*]AGCGCTAAGTTTTCGCTTCTTCTT  | n/a                               | pNH032 <sup>h</sup> | 0.8             |
| mCerulean::[(G <sub>4</sub> S) <sub>3</sub> ]::2xNLS            | pNH073                   | 2.6             | ATGGCCGCCTCAAAGGAGAAGAA     | [*]AGCGCTAAGTTTTCGCTTCTTCTT  | n/a                               | pNH033 <sup>h</sup> | 0.8             |
| mTFP1[B]                                                        | pNH054                   | 2.4             | ATGGCCGCCTCAAAGGAGAAGAA     | [*]AGCGCTTACGTAGAGCTCGTCCAT  | n/a                               | pNH078              | 0.8             |
| mCitrine[α]                                                     | pNH055                   | 2.4             | ATGGCCGCCAGTAAGGGTGAGGAG    | [*]AGCGCTTACGTAGAGCTCATCCAT  | n/a                               | pNH079              | 0.8             |
| mCherry[β]                                                      | pNH056                   | 2.4             | ATGGCCGCCAGTAAGGGTGAGGAG    | [*]AGCGCTTACGTAGAGCTCATCCAT  | n/a                               | pNH080              | 0.8             |
| mCerulean[γ]                                                    | pNH057                   | 2.4             | ATGGCCGCCTCAAAGGAGAAGAA     | [*]AGCGCTTACGTAGAGCTCGTCCAT  | n/a                               | pNH081              | 0.8             |
| mTFP1[BC]                                                       | pNH054                   | 2.4             | ATGGCCGCCTCAAAGGAGAAGAA     | [*]AGCGCTTACGTAGAGCTCGTCCAT  | n/a                               | pNH082              | 0.8             |
| mCitrine[αD]                                                    | pNH055                   | 2.4             | ATGGCCGCCAGTAAGGGTGAGGAG    | [*]AGCGCTTACGTAGAGCTCATCCAT  | n/a                               | pNH083              | 0.8             |
| mCherry[βE]                                                     | pNH056                   | 2.4             | ATGGCCGCCAGTAAGGGTGAGGAG    | [*]AGCGCTTACGTAGAGCTCATCCAT  | n/a                               | pNH084 <sup>i</sup> | 0.8             |
| mCerulean[γF]                                                   | pNH057                   | 2.4             | ATGGCCGCCTCAAAGGAGAAGAA     | [*]AGCGCTTACGTAGAGCTCGTCCAT  | n/a                               | pNH085              | 0.8             |

<sup>a</sup> sequence to be seamlessly inserted into target; <sup>b</sup> the counter-selection RT-cassette should be PCR-amplified from this construct using, as template, the RT-cassette-containing *NotI-NotI* fragment; <sup>c</sup> the desired replacement cassette can be excised, as a *NotI-NotI* fragment, from either the pCC1Fos- (if available) or parental pGOv5-based (Table 1) constructs; <sup>d</sup> approximate sizes of the isolated *NotI*-fragment (or *NcoI-NcoI* fragment for pNH034) to be used as PCR template or replacement sequence; <sup>e</sup> suggested ODN sequence sequences required to PCR-amplify RT-cassette-containing sequence. Reverse ODN sequence lacks a 5' stop triplet [\*]; <sup>f</sup> intron-containing (see ref 4); <sup>g</sup> intron-containing (see ref 16); <sup>h</sup> 3' homology arm of replacement sequence is 63 bp long; <sup>i</sup> 3' homology arm of replacement sequence is 100 bp long; n/a = not available

**Table S7. Strains generated during the course of the present work**

| Strain <sup>a</sup> | Genotype <sup>b</sup>                                                            | Construct <sup>c</sup> |
|---------------------|----------------------------------------------------------------------------------|------------------------|
| CTD1025             | N2 whEx[ <i>Pmyo-3</i> > <i>mCitrine::C-TAP-TAG::2xNLS</i> ]                     | pNH023                 |
| CTD1026             | N2 whEx[ <i>Pmyo-3</i> > <i>mCherry::C-TAP-TAG::2xNLS</i> ]                      | pNH024                 |
| CTD1027             | N2 whEx[ <i>Pmyo-3</i> > <i>mCerulean::C-TAP-TAG::2xNLS</i> ]                    | pNH025                 |
| CTD1028             | N2 whEx[ <i>Pmyo-3</i> > <i>mTFP1::C-TAP-TAG::2xNLS</i> ]                        | pNH022                 |
| CTD1029             | N2 whEx[ <i>Pmyo-3</i> > <i>mCherry</i> ]                                        | pNH035                 |
| CTD1030             | N2 whEx[ <i>Pmyo-3</i> > <i>mTFP1</i> ]                                          | pNH047                 |
| CTD1031             | N2 whEx[ <i>Pmyo-3</i> > <i>mCitrine</i> ]                                       | pNH048                 |
| CTD1032             | N2 whEx[ <i>Pmyo-3</i> > <i>mCerulean</i> ]                                      | pNH049                 |
| CTD1033             | N2 whEx[ <i>Pmyo-3</i> > <i>F-CFP</i> ]                                          | pNH074                 |
| CTD1034             | N2 whEx[ <i>Pmyo-3</i> > <i>F-YFP</i> ]                                          | pNH076                 |
| CTD1035             | N2 whEx[ <i>Pmyo-3</i> > <i>Mc-mCherry</i> ]                                     | pNH077                 |
| CTD1036             | N2 whEx[ <i>Pmyo-3</i> > <i>mTFP1(2I)</i> ]                                      | pNH086                 |
| CTD1037             | N2 whEx[ <i>Pmyo-3::mCitrine(2I)</i> ]                                           | pNH087                 |
| CTD1038             | N2 whEx[ <i>Pmyo-3</i> > <i>mCherry(2I)</i> ]                                    | pNH088                 |
| CTD1039             | N2 whEx[ <i>Pmyo-3</i> > <i>mCerulean(2I)</i> ]                                  | pNH089                 |
| CTD1040             | N2 whEx[ <i>F09E5.15::mCitrine(2I)</i> ]                                         | fNH066                 |
| CTD1041             | N2 whEx[ <i>EEED8.6::mCherry(2I)</i> ]                                           | fNH067                 |
| CTD1050             | N2 whEx[ <i>F09E5.3::mTFP1(2I)</i> ]                                             | fNH068                 |
| CTD1051             | N2 whEx[ <i>F09E5.15::F-YFP</i> ]                                                | fNH059                 |
| CTD1052             | N2 whEx[ <i>EEED8.6::Mc-mCherry</i> ]                                            | fNH060                 |
| CTD1053             | N2 whEx[ <i>F09E5.3::mTFP1(2I);F09E5.15::mCitrine(2I);EEED8.6::mCherry(2I)</i> ] | fNH088                 |
| CTD1054             | N2 whEx[ <i>F09E5.15::mCitrine</i> ]                                             | fNH062                 |
| CTD1055             | N2 whEx[ <i>F09E5.3::F-CFP;F09E5.15::F-YFP;EEED8.6::Mc-mCherry</i> ]             | fNH086                 |
| CTD1056             | N2 whEx[ <i>F09E5.3::mTFP1;F09E5.15::mCitrine;EEED8.6::mCherry</i> ]             | fNH087                 |
| CTD1057             | N2 whEx[ <i>F09E5.3::mTFP1</i> ]                                                 | fNH064                 |
| CTD1058             | N2 whEx[ <i>EEED8.6::mCherry</i> ]                                               | fNH063                 |
| CTD1059             | N2 whEx[ <i>F09E5.3::F-CFP</i> ]                                                 | fNH058                 |

<sup>a</sup> Lab strain name; <sup>b</sup> allele number not shown; <sup>c</sup> see Table 1 and Fig.S1 for plasmid- and fosmid-based construct details
